# Supplementary material for: A rapid and ultrasensitive paper sensor for Bacillus cereus Haemolysin BL detection
Source: Royal Society of Chemistry journal article supplement (doi:10.1039/d4an00813h), 2024-01-01
Supplement: d4an00813h1.pdf [file d4an00813h1.pdf]

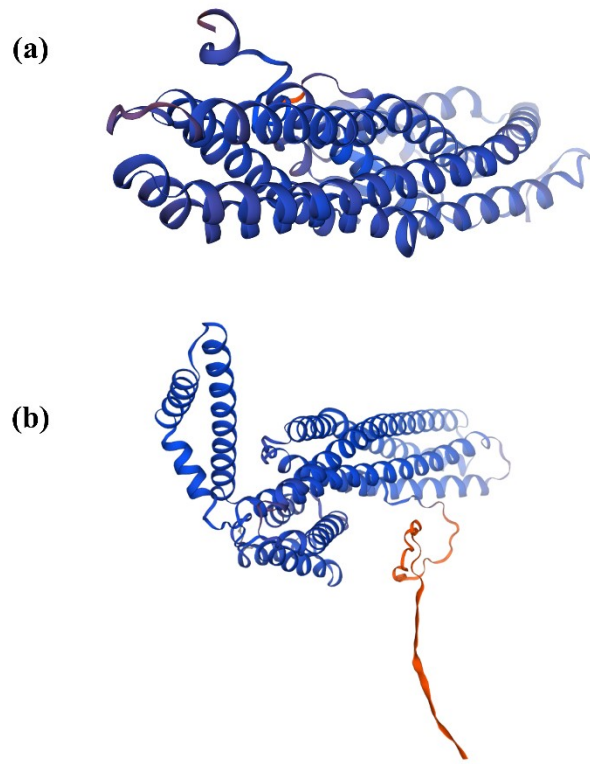

**Fig. S3** The conformation prediction for Hbl B and L2.

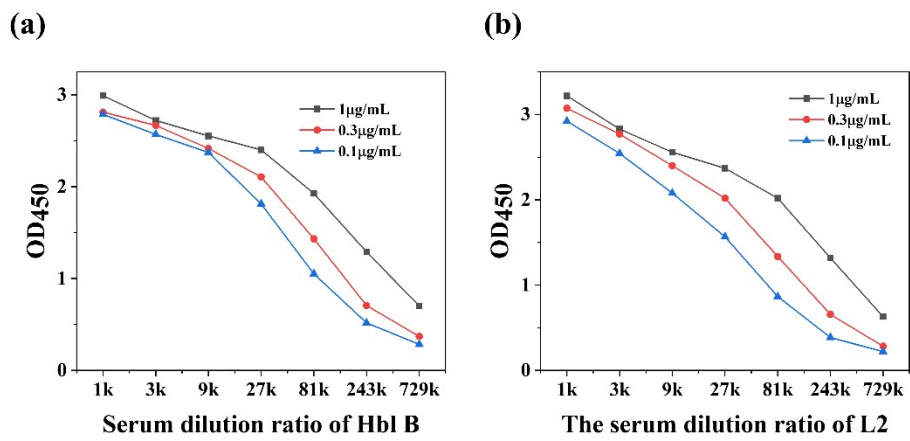

**Fig. S4** Serum titer of Hbl B and L2 before cell fusion.

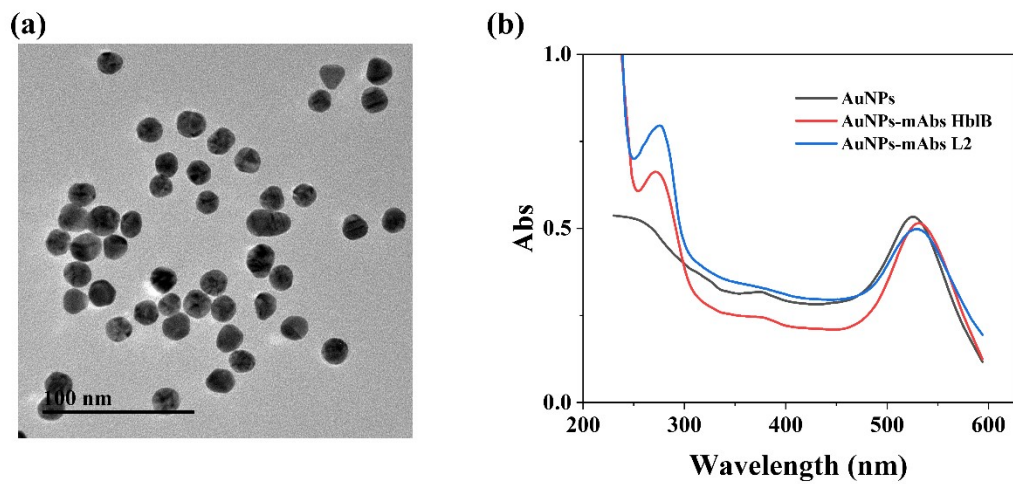

**Fig. S5** Characterization of AuNPs and AuNPs labelled mAbs, (a) TEM of AuNPs, (b) UV-Vis absorption spectra of AuNPs and AuNPs labelled mAbs.
